# Supplementary material
Source: HighWire-hosted journal article supplement (https://bmjopen.bmj.com/content/7/5/e013192)
Supplement: inline-supplementary-material-1 [file inline-supplementary-material-1.pdf]

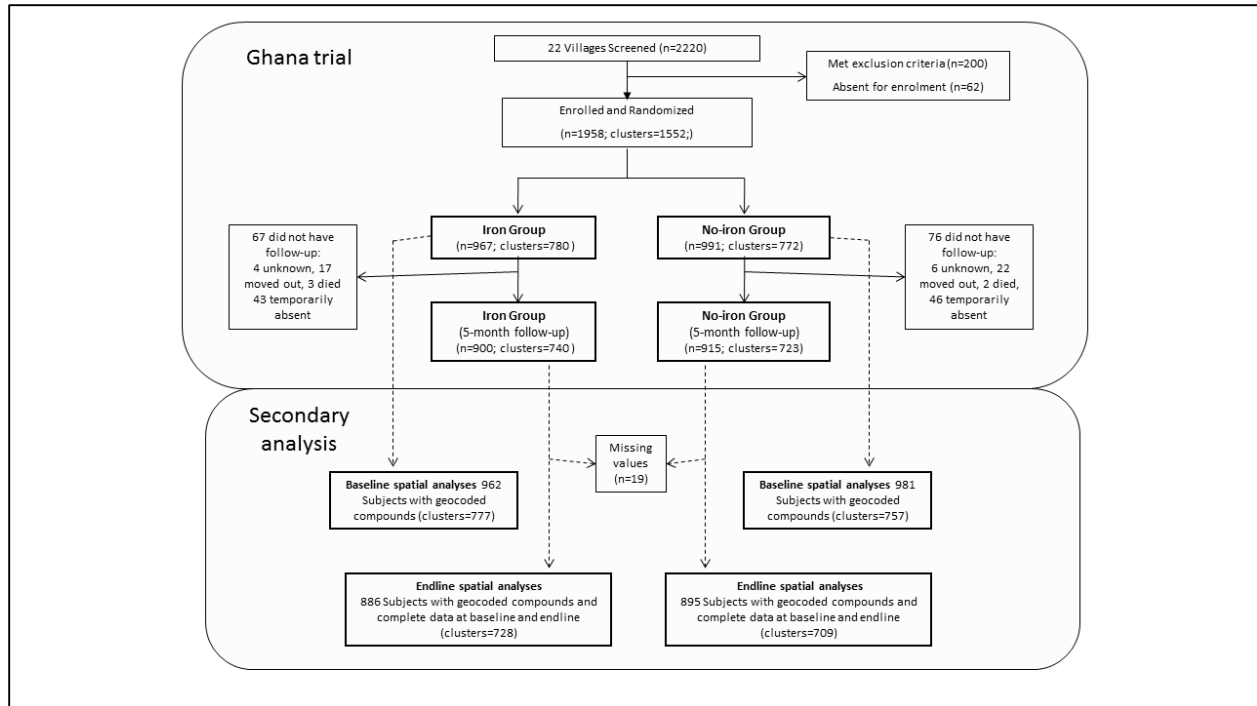

**Figure S1:** Study flow for the Ghana trial (top section) and secondary analyses (bottom section). Out of the 1958 participants from the Ghana trial, a total of 1943 with geocoded compounds were included in the baseline secondary spatial analyses (13 compounds were untraceable, corresponding to 15 participants not included in the secondary analyses). The endline spatial analyses included a total of 1781 observation, representing trial participants with geocoded compounds who provided blood samples at the end of the intervention period (5-month follow-up), and after removing 19 observations due to missing baseline or endline ferritin values.
